# Supplementary material for: Community Participation Differences Between Adults With or Without Serious Mental Illness
Source: Atypon-hosted journal article supplement (doi:10.1176/appi.ps.201900608), 2020-09-23
Supplement: appi.ps.201900608.ds001.pdf [file appi.ps.201900608.ds001.pdf]

## Supplementary Table

## Summary of the characteristics of CMHC (N=300) and the general population (N=300) samples

|                                            | CMHC |    | The general population |    | Chi-square Test |    |       |
|--------------------------------------------|------|----|------------------------|----|-----------------|----|-------|
|                                            | n    | %  | n                      | %  | $\chi^2$        | df | p     |
| Sex <sup>a</sup>                           |      |    |                        |    | 1.69            | 1  | .193  |
| Female                                     | 178  | 60 | 164                    | 55 |                 |    |       |
| Race                                       |      |    |                        |    |                 |    |       |
| White Alone                                | 179  | 60 | 236                    | 79 | 25.39           | 1  | <.001 |
| Black Alone                                | 76   | 25 | 29                     | 10 | 25.50           | 1  | <.001 |
| Asian Alone                                | 2    | 1  | 4                      | 1  | 0.67            | 1  | .412  |
| Hispanic/Latino Alone                      | 12   | 4  | 9                      | 3  | 0.44            | 1  | .505  |
| Native American Alone                      | 3    | 1  | 4                      | 1  | 0.14            | 1  | .704  |
| Pacific Islander Alone                     | 0    | 0  | 1                      | 0  | 1.00            | 1  | .317  |
| Other Race Alone                           | 6    | 2  | 2                      | 1  | 2.03            | 1  | .155  |
| Multiracial (Including Hispanic/Latino)    | 22   | 7  | 15                     | 5  | 1.41            | 1  | .235  |
| Education <sup>b</sup>                     |      |    |                        |    | 109.91          | 2  | <.001 |
| Less than High School                      | 66   | 22 | 13                     | 4  |                 |    |       |
| High School or GED                         | 101  | 34 | 32                     | 11 |                 |    |       |
| More than High School                      | 132  | 44 | 254                    | 85 |                 |    |       |
| Having an independent housing <sup>c</sup> | 177  | 59 | 281                    | 94 | 103.87          | 1  | <.001 |
| Currently Employed <sup>d</sup>            | 48   | 16 | 180                    | 60 | 122.93          | 1  | <.001 |
| Ever Employed <sup>d</sup>                 | 267  | 89 | 294                    | 98 | 21.00           | 1  | <.001 |
| Own Car <sup>e</sup>                       | 58   | 20 | 255                    | 85 | 257.41          | 1  | <.001 |
| Urban Block Group <sup>f</sup>             | 213  | 71 | 184                    | 64 | 2.98            | 1  | .085  |

<sup>a</sup> Data available for 297 participants for CMHC sample.

<sup>b</sup> Data available for 299 participants for CMHC sample and 298 participants for the general population sample.

<sup>c</sup> Data available for 298 participants for the general population samples.

<sup>d</sup> Data available for 299 participants for both CMHC and the general population samples.

<sup>e</sup> Data available for 298 participants for CMHC sample.

<sup>f</sup> Data available for 286 participants for the general population sample.

Supplementary Table

Comparison of participation amount between CMHC (N=300) and the general population (N=300) samples

|                                                 | CMHC |      |       | The general population |       |       | T-Test   |           |          |
|-------------------------------------------------|------|------|-------|------------------------|-------|-------|----------|-----------|----------|
|                                                 | n    | Mean | SD    | n                      | Mean  | SD    | <i>t</i> | <i>df</i> | <i>p</i> |
| Shopping                                        | 299  | 7.12 | 7.44  | 300                    | 9.80  | 6.54  | -4.68    | 586.74    | <.001    |
| Restaurant/Coffee Shop                          | 299  | 3.38 | 5.80  | 300                    | 6.21  | 5.90  | -5.91    | 596.89    | <.001    |
| Place of Worship                                | 299  | 2.51 | 4.80  | 300                    | 2.55  | 3.89  | -0.11    | 571.50    | .915     |
| Movie                                           | 299  | 0.40 | 1.18  | 300                    | 0.49  | 0.89  | -1.08    | 552.84    | .282     |
| Park/Recreation Center                          | 299  | 3.02 | 6.57  | 300                    | 2.99  | 5.83  | 0.06     | 588.06    | .953     |
| Theater/Cultural Event                          | 299  | 0.34 | 1.12  | 300                    | 0.73  | 1.83  | -3.14    | 496.40    | .002     |
| Zoo/Botanical Garden/Museum                     | 299  | 0.22 | 1.40  | 300                    | 0.28  | 0.81  | -0.67    | 477.79    | .504     |
| Run Errands                                     | 300  | 6.96 | 9.03  | 300                    | 9.25  | 8.30  | -3.23    | 593.77    | .001     |
| Library                                         | 300  | 1.89 | 4.43  | 300                    | 1.35  | 3.52  | 1.66     | 568.61    | .097     |
| Watch a Sports Event                            | 300  | 0.46 | 2.26  | 300                    | 0.65  | 1.52  | -1.17    | 524.14    | .244     |
| Gym                                             | 300  | 1.42 | 3.70  | 300                    | 3.36  | 6.41  | -4.53    | 478.55    | <.001    |
| Barber Shop                                     | 299  | 0.57 | 1.28  | 300                    | 0.78  | 0.99  | -2.33    | 559.41    | .020     |
| Use Public Transit                              | 296  | 7.37 | 10.32 | 300                    | 1.05  | 3.88  | 9.87     | 375.98    | <.001    |
| Social Group in the Community                   | 300  | 1.19 | 3.90  | 300                    | 1.47  | 2.93  | -1.02    | 554.55    | .309     |
| Work for Pay                                    | 300  | 2.31 | 6.10  | 300                    | 11.37 | 10.63 | -12.8    | 476.94    | <.001    |
| School for Degree                               | 300  | 0.25 | 2.03  | 300                    | 0.58  | 3.32  | -1.47    | 495.40    | .143     |
| Class for Leisure/Life Skills                   | 300  | 1.03 | 3.16  | 300                    | 0.25  | 1.89  | 3.68     | 488.54    | <.001    |
| Volunteer                                       | 300  | 2.92 | 6.63  | 300                    | 2.57  | 5.29  | 0.71     | 569.99    | .480     |
| Get together/Attend Event with Family & Friends | 300  | 1.55 | 3.70  | 300                    | 1.66  | 2.59  | -0.42    | 535.96    | .673     |
| Entertain Family or Friends or Visit Them       | 300  | 4.64 | 7.43  | 300                    | 4.67  | 5.27  | -0.06    | 539.36    | .955     |
| Community Fair, Event or Activity               | 299  | 0.62 | 2.44  | 300                    | 0.36  | 1.16  | 1.66     | 426.91    | .098     |
| Civic/Political Activities                      | 300  | 0.42 | 2.39  | 300                    | 0.27  | 1.10  | 0.99     | 419.44    | .325     |

Supplemental Table

Comparison of participation sufficiency between CMHC and the general population sample

|                                                 | CMHC           |                |       | The general population |                |       | Chi-Square Test |    |       |
|-------------------------------------------------|----------------|----------------|-------|------------------------|----------------|-------|-----------------|----|-------|
|                                                 | N <sup>a</sup> | n <sup>b</sup> | %     | N <sup>a</sup>         | n <sup>b</sup> | %     | $\chi^2$        | df | p     |
| Shopping                                        | 271            | 162            | 59.78 | 259                    | 200            | 77.22 | 18.61           | 1  | <.001 |
| Restaurant/Coffee Shop                          | 208            | 88             | 42.31 | 210                    | 141            | 67.14 | 26.02           | 1  | <.001 |
| Place of Worship                                | 240            | 98             | 40.83 | 216                    | 130            | 60.19 | 17.03           | 1  | <.001 |
| Movie                                           | 171            | 56             | 32.75 | 135                    | 65             | 48.15 | 7.48            | 1  | .006  |
| Park/Recreation Center                          | 219            | 70             | 31.96 | 210                    | 89             | 42.38 | 4.99            | 1  | .025  |
| Theater/Cultural Event                          | 170            | 35             | 20.59 | 181                    | 80             | 44.20 | 22.18           | 1  | <.001 |
| Zoo/Botanical Garden/Museum                     | 175            | 37             | 21.14 | 190                    | 60             | 31.58 | 5.08            | 1  | .024  |
| Run Errands                                     | 271            | 156            | 57.56 | 256                    | 199            | 77.73 | 24.36           | 1  | <.001 |
| Library                                         | 201            | 85             | 42.29 | 173                    | 114            | 65.90 | 20.81           | 1  | <.001 |
| Watch a Sports Event                            | 120            | 41             | 34.17 | 131                    | 72             | 54.96 | 10.94           | 1  | .001  |
| Gym                                             | 205            | 62             | 30.24 | 193                    | 63             | 32.64 | 0.27            | 1  | .606  |
| Barber Shop                                     | 209            | 101            | 48.33 | 194                    | 152            | 78.35 | 38.82           | 1  | <.001 |
| Use Public Transit                              | 211            | 131            | 62.09 | 83                     | 61             | 73.49 | 3.42            | 1  | .064  |
| Social Group in the Community                   | 183            | 78             | 42.62 | 172                    | 96             | 55.81 | 6.17            | 1  | .013  |
| Work for Pay                                    | 237            | 68             | 28.69 | 244                    | 140            | 57.38 | 40.31           | 1  | <.001 |
| School for Degree                               | 193            | 65             | 33.68 | 121                    | 79             | 65.29 | 29.93           | 1  | <.001 |
| Class for Leisure/Life Skills                   | 187            | 64             | 34.22 | 140                    | 45             | 32.14 | 0.16            | 1  | .693  |
| Volunteer                                       | 225            | 90             | 40.00 | 235                    | 118            | 50.21 | 4.84            | 1  | .028  |
| Get together/Attend Event with Family & Friends | 248            | 88             | 35.48 | 254                    | 158            | 62.20 | 35.85           | 1  | <.001 |
| Entertain Family or Friends or Visit Them       | 255            | 115            | 45.10 | 291                    | 189            | 64.95 | 21.70           | 1  | <.001 |
| Community Fair, Event or Activity               | 163            | 55             | 33.74 | 177                    | 96             | 54.24 | 14.44           | 1  | .001  |
| Civic/Political Activities                      | 123            | 58             | 47.15 | 143                    | 88             | 61.54 | 5.53            | 1  | .019  |

<sup>a</sup> The number of participants who considered the activity was important.

<sup>b</sup> The number of participants, among those who indicated the activity was important, who had done the activity enough.
